# Supplementary material for: Temporal patterns in Ixodes ricinus microbial communities: an insight into tick-borne microbe interactions
Source: PubMed Central journal article supplement (PMC8254910; doi:10.1186/s40168-021-01051-8), 2021-07-03

**A**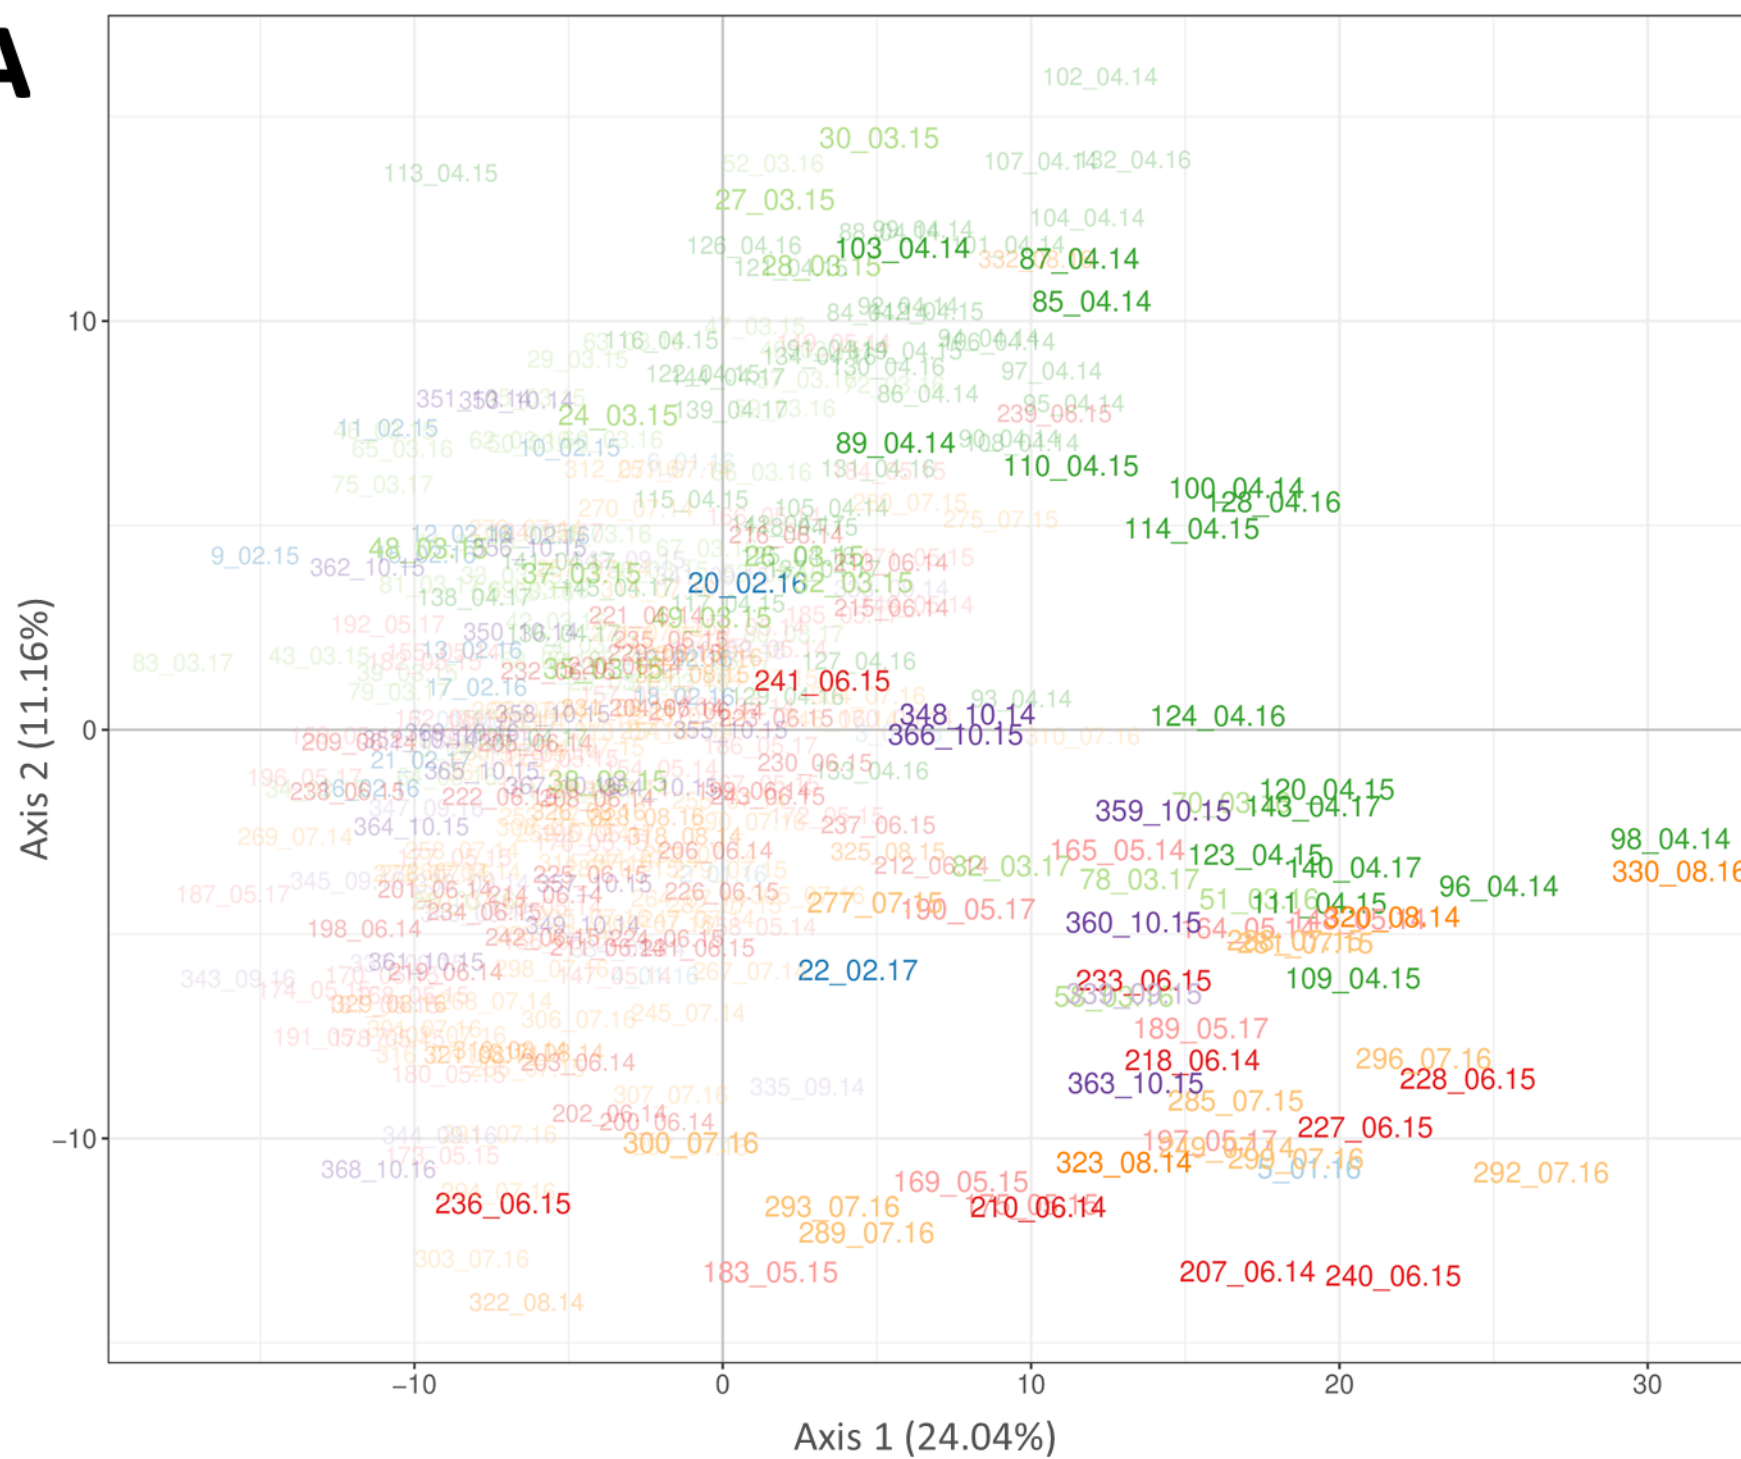**B**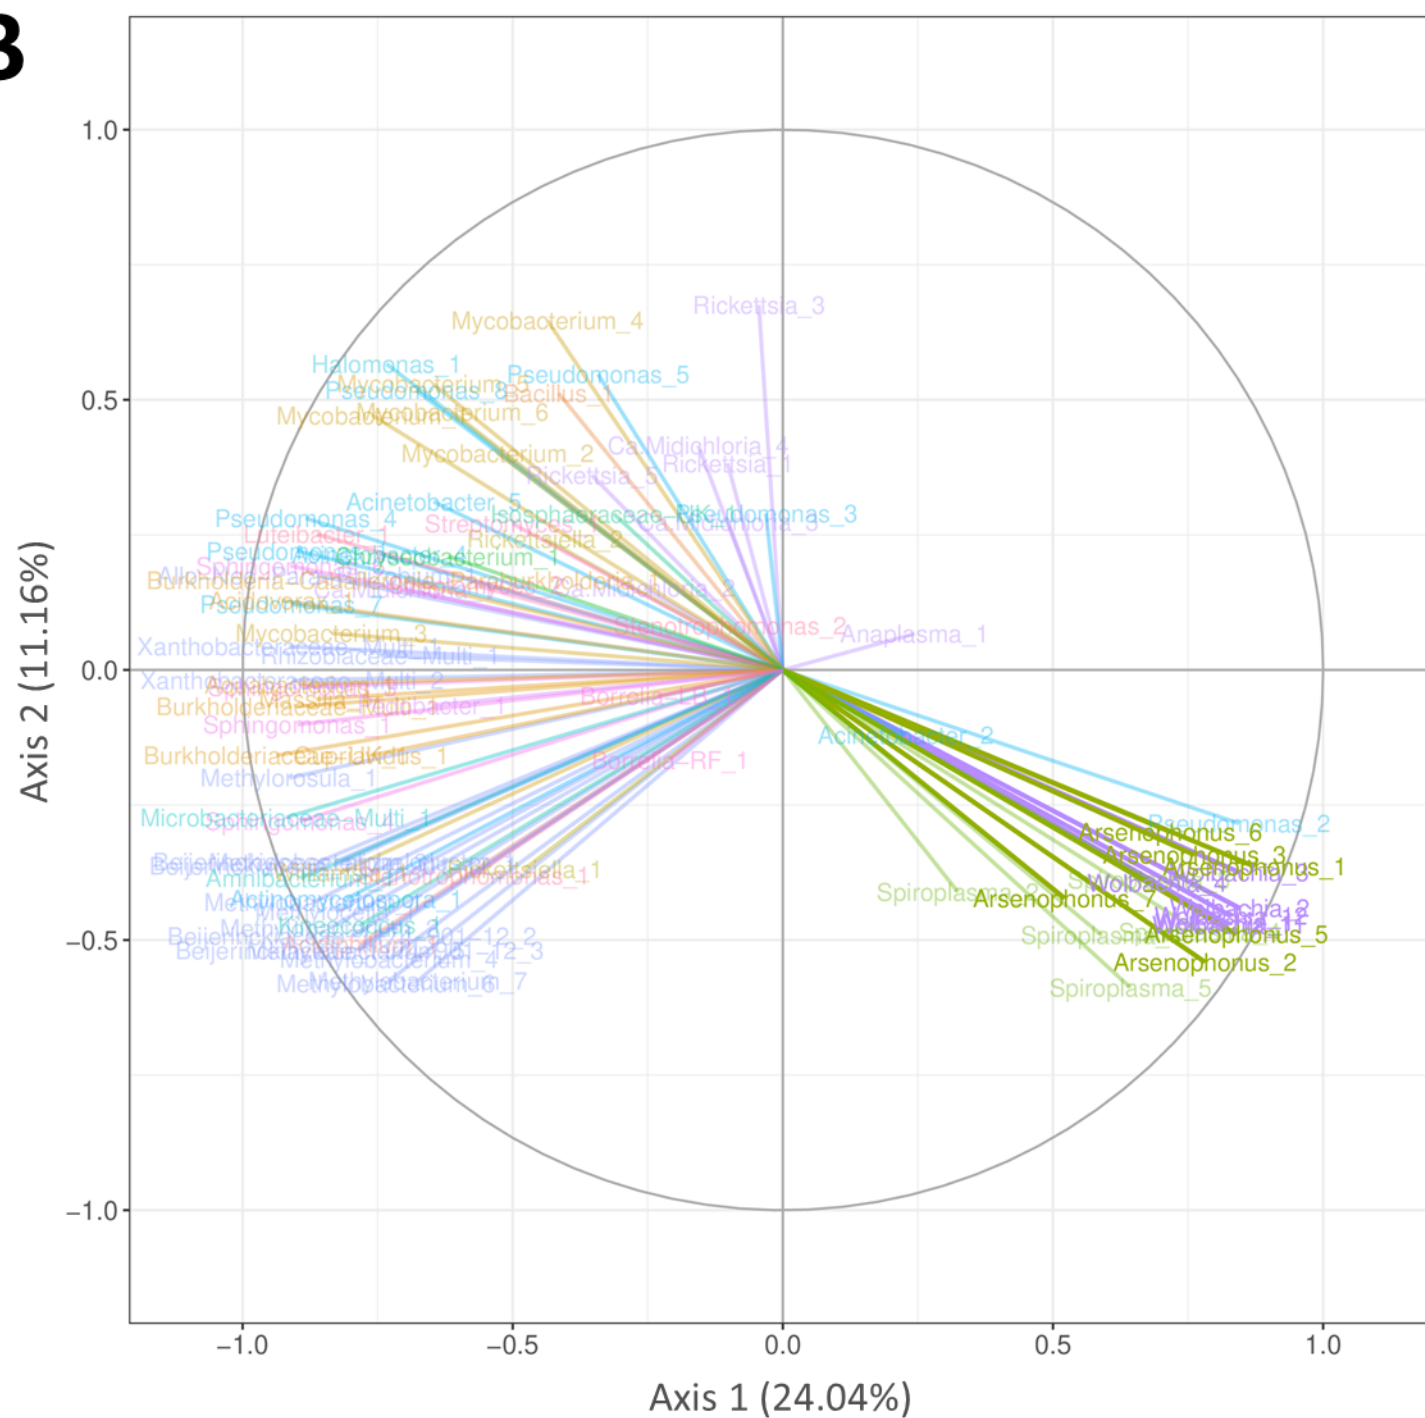

Supplement: 40168_2021_1051_MOESM3_ESM.pdf [file 40168_2021_1051_MOESM3_ESM.pdf]
