# Supplementary material for: Temporal patterns in Ixodes ricinus microbial communities: an insight into tick-borne microbe interactions
Source: PubMed Central journal article supplement (PMC8254910; doi:10.1186/s40168-021-01051-8), 2021-07-03
Supplement: 40168_2021_1051_MOESM4_ESM.pdf [file 40168_2021_1051_MOESM4_ESM.pdf]

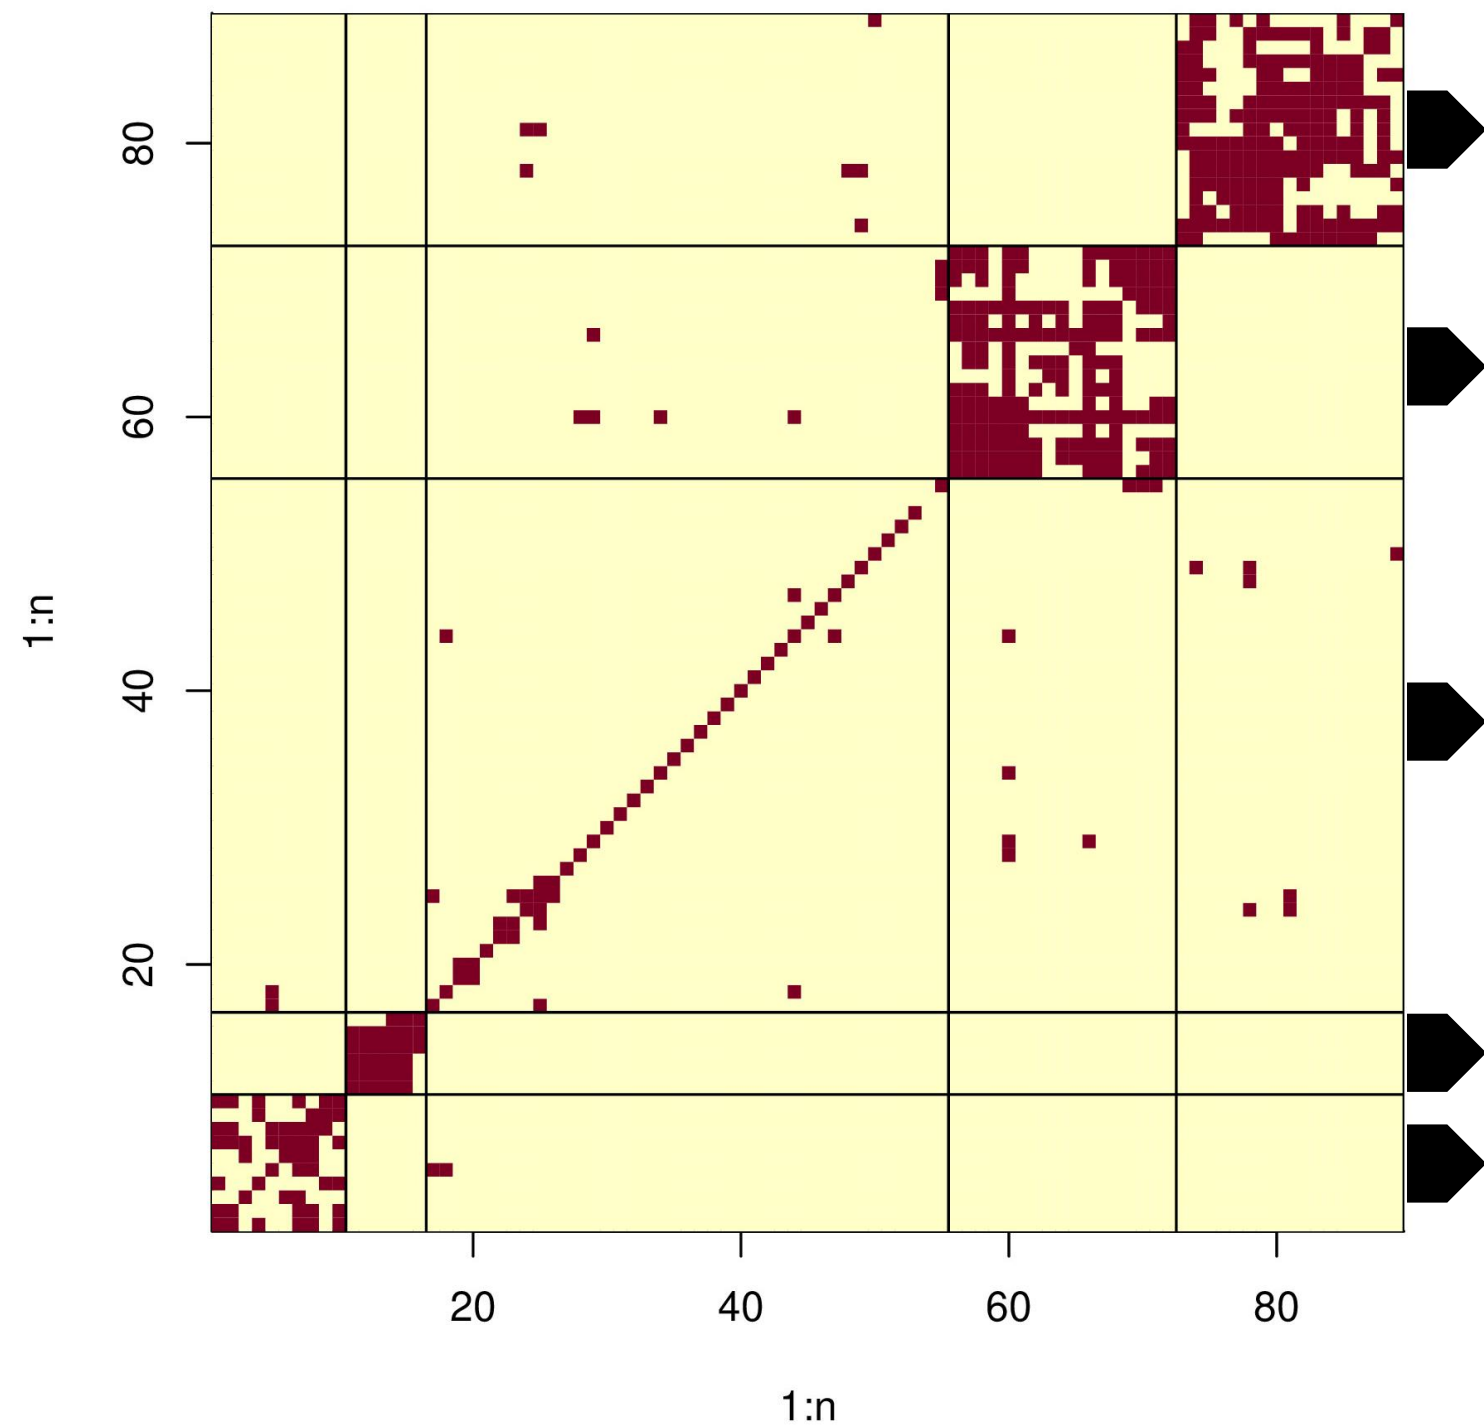

**Cluster 5** = Acidiphilium\_1; Methylobacterium\_6; Methylobacterium\_1; Methylobacterium\_7; Methylobacterium\_3; Methylobacterium\_5; Methylobacterium\_2; Methylobacterium\_4; Methylosrula\_1; Beijerinckiaceae\_alphal.cluster\_1; Beijerinckiaceae\_1174-901-12\_2; Beijerinckiaceae\_1174-901-12\_1; Beijerinckiaceae\_1174-901-12\_3; Methylocella\_1; Burkholderiaceae-UK\_1; Amnibacterium\_1; Kineococcus\_1

**Cluster 4** = Wolbachia\_11; Wolbachia\_12; Wolbachia\_2; Wolbachia\_4; Wolbachia\_3; Wolbachia\_1; Pseudomonas\_2; Arsenophonus\_7; Arsenophonus\_6; Arsenophonus\_3; Arsenophonus\_5; Arsenophonus\_1; Arsenophonus\_2; Spiroplasma\_1; Spiroplasma\_3; Spiroplasma\_5; Spiroplasma\_4

**Cluster 3** = Ca.Midichloria\_1; Ca.Midichloria\_2; Anaplasma\_1; Xanthobacteraceae-Multi\_2; Xanthobacteraceae-Multi\_1; Sphingomonas\_4; Sphingomonas\_6; Sphingomonas\_1; Sphingomonas\_3; Acinetobacter\_4; Pseudomonas\_4; Pseudomonas\_1; Pseudomonas\_3; Rickettsiella\_1; Rickettsiella\_2; Pseudomonas\_8; Halomonas\_1; Stenotrophomonas\_2; Acinetobacter\_5; Acinetobacter\_2; Massilia\_1; Burkholderia-Caballeronia-Paraburkholderia\_1; Bacillus\_1; Spiroplasma\_2; Streptomyces\_1; Streptomyces\_2; Mycobacterium\_5; Mycobacterium\_2; Mycobacterium\_1; Mycobacterium\_3; Mycobacterium\_4; Mycobacterium\_6; Williamsia\_1; Actinomycetospora\_1; Microbacteriaceae-Multi\_1; Isosphaeraceae-UK\_1; Chryseobacterium\_1; Borrelia-RF\_1; Borrelia-LB\_1

**Cluster 2** = Ca.Midichloria\_4; Ca.Midichloria\_3; Rickettsia\_5; Rickettsia\_1; Rickettsia\_3; Pseudomonas\_5

**Cluster 1** = Rhizobiaceae-Multi\_1; Allo-Neo-Para-Rhizobium\_1; Pseudomonas\_7; Stenotrophomonas\_1; Luteibacter\_1; Acidovorax\_1; Burkholderiaceae-Multi\_1; Aquabacterium\_1; Cupriavidus\_1; Pedobacter\_1
